# Supplementary material
Source: PubMed Central journal article supplement (PMC5444653)
Supplement: NIHMS858307-supplement-Supplement1.pdf [file NIHMS858307-supplement-Supplement1.pdf]

## Supplementary Appendix

This appendix has been provided by the authors to give readers additional information about their work.

Supplement to: Agus MSD, Wypij D, Hirshberg EL, et al. Tight glycemic control in critically ill children. *N Engl J Med* 2017;376:729-41. DOI: 10.1056/NEJMoa1612348

# Supplementary Data, Figures, and Tables

---

## Table of Contents

|                                                                                                                                 |    |
|---------------------------------------------------------------------------------------------------------------------------------|----|
| HALF-PINT Study Investigator List.....                                                                                          | 2  |
| Study Organization.....                                                                                                         | 3  |
| Study Leadership Committee.....                                                                                                 | 3  |
| Ancillary Study Committee .....                                                                                                 | 3  |
| Manuscript Oversight Committee (MOC).....                                                                                       | 4  |
| Data and Safety Monitoring Board (DSMB).....                                                                                    | 4  |
| National Heart, Lung, and Blood Institute Staff (NHLBI) .....                                                                   | 4  |
| Clinical Coordinating Center (CCC).....                                                                                         | 4  |
| Data Coordinating Center (DCC).....                                                                                             | 4  |
| Other Study Performance Sites .....                                                                                             | 5  |
| Pediatric Acute Lung Injury & Sepsis Investigators (PALISI) .....                                                               | 5  |
| Inclusion/Exclusion Criteria .....                                                                                              | 6  |
| Inclusion Criteria .....                                                                                                        | 6  |
| Exclusion Criteria.....                                                                                                         | 6  |
| Early Stopping .....                                                                                                            | 7  |
| Supplemental Figures .....                                                                                                      | 9  |
| Figure S1. Children’s Hospital EuglyCemia for Kids Spreadsheet (CHECKS) interface.....                                          | 9  |
| Figure S2. Time-Weighted Glucose Averages through Day 28, According to Study Group.                                             | 10 |
| Figure S3. Time to Study-defined ICU Discharge in Intention-To-Treat Analysis of 713<br>Patients, According to Study Group..... | 11 |
| Supplemental Tables.....                                                                                                        | 12 |
| Table S1. Reasons Patients were Ineligible or Guardian was not Approached. ....                                                 | 12 |
| Table S2. Reasons Patients were Consented but Not Randomized. ....                                                              | 13 |

## HALF-PINT Study Investigator List

The following investigators contributed subjects to the analyses presented in this manuscript.

| Investigator                                         | Site                                                                                                      | Location           |
|------------------------------------------------------|-----------------------------------------------------------------------------------------------------------|--------------------|
| Michael Agus, MD                                     | Boston Children's Hospital, Harvard Medical School                                                        | Boston, MA         |
| Vinay Nadkarni, MD<br>Vijay Srinivasan, MD           | Children's Hospital of Philadelphia, Perelman School of Medicine at the University of Pennsylvania        | Philadelphia, PA   |
| Katherine Biagas, MD                                 | Columbia University Medical Center, Columbia University College of Physicians and Surgeons                | New York, NY       |
| Peter M. Mourani, MD                                 | Children's Hospital Colorado, University of Colorado School of Medicine                                   | Aurora, CO         |
| Ranjit Chima, MD                                     | Cincinnati Children's Hospital Medical Center, University of Cincinnati College of Medicine               | Cincinnati, OH     |
| Neal J. Thomas, MD, MS                               | Penn State Hershey Children's Hospital, Penn State College of Medicine                                    | Hershey, PA        |
| Simon Li, MD<br>Alan Pinto, MD                       | Maria Fareri Children's Hospital, Westchester Medical Center                                              | Valhalla, NY       |
| Christopher Newth, MD, FRCPC                         | Children's Hospital Los Angeles, Keck School of Medicine of USC                                           | Los Angeles, CA    |
| Amanda Hassinger, MD, MS                             | Women and Children's Hospital of Buffalo, University at Buffalo School of Medicine                        | Buffalo, NY        |
| Kris Bysani, MD                                      | Medical City Children's Hospital                                                                          | Dallas, TX         |
| Kyle J. Rehder, MD                                   | Duke Children's Hospital and Health Center, Duke University School of Medicine                            | Durham, NC         |
| Edward Vincent Faustino, MD, MHS<br>Sarah Kandil, MD | Yale - New Haven Children's Hospital, Yale School of Medicine                                             | New Haven, CT      |
| Eliotte Hirshberg, MD                                | Intermountain Medical Center, University of Utah School of Medicine                                       | Salt Lake City, UT |
| Kupper Wintergerst, MD                               | Norton Children's Hospital, University of Louisville School of Medicine                                   | Louisville, KY     |
| Adam Schwarz, MD                                     | Children's Hospital of Orange County, University of California, Irvine, School of Medicine                | Orange, CA         |
| Dayanand Bagdure, MD                                 | University of Maryland Medical Center, University of Maryland School of Medicine                          | Baltimore, MD      |
| Lauren Marsillio, MD                                 | Ann & Robert H. Lurie Children's Hospital of Chicago, Northwestern University Feinberg School of Medicine | Chicago, IL        |
| Natalie Cvijanovich, MD                              | UCSF Benioff Children's Hospital Oakland, UCSF School of Medicine                                         | Oakland, CA        |
| Nga Pham, MD                                         | Children's Healthcare of Atlanta, Emory University School of Medicine                                     | Atlanta, GA        |
| Michael Quasney, MD<br>Heidi Flori, MD               | C.S. Mott Children's Hospital, University of Michigan Medical School                                      | Ann Arbor, MI      |
| Myke Federman, MD                                    | Mattel Children's Hospital, David Geffen School of Medicine at UCLA                                       | Los Angeles, CA    |
| Sholeen Nett, MD                                     | Dartmouth Hitchcock Medical Center, Geisel School of Medicine at Dartmouth                                | Lebanon, NH        |
| Neethi Pinto, MD, MS                                 | The University of Chicago Comer Children's Hospital, Pritzker School of Medicine                          | Chicago, IL        |
| Shirley Viteri, MD                                   | Nemours/Alfred I. duPont Hospital for Children, Sidney Kimmel Medical College at TJU                      | Wilmington, DE     |

|                                         |                                                                                      |                          |
|-----------------------------------------|--------------------------------------------------------------------------------------|--------------------------|
| James Schneider, MD                     | Cohen Children's Medical Center of NY, Hofstra Northwell School of Medicine          | New Hyde Park, NY        |
| Shivanand Medar, MD                     | The Children's Hospital at Montefiore, Albert Einstein College of Medicine           | Bronx, NY                |
| Anil Sapru, MD<br>Patrick McQuillen, MD | UCSF Benioff Children's Hospital, UCSF School of Medicine                            | San Francisco, CA        |
| Christopher Babbitt, MD                 | Miller Women & Children's Hospital, University of California, Irvine, Medical School | Long Beach, CA           |
| John C. Lin, MD                         | St. Louis Children's Hospital, Washington University School of Medicine              | St. Louis, MO            |
| Philippe Jovet, MD                      | CHU Sainte-Justine, University of Montreal Faculty of Medicine                       | Montreal, Quebec, Canada |
| Ofer Yanay, MD                          | Seattle Children's Hospital, University of Washington School of Medicine             | Seattle, WA              |
| Christine Allen, MD                     | The Children's Hospital of Oklahoma, University of Oklahoma College of Medicine      | Oklahoma City, OK        |

The following investigators were instrumental in trial design, oversight, and preparation of this manuscript.

| Investigator             | Site                                      | Location         |
|--------------------------|-------------------------------------------|------------------|
| Andrea Harabin, PhD      | National Heart, Lung, and Blood Institute | Bethesda, MD     |
| Natalie Hasbani, MPH     | Boston Children's Hospital                | Boston, MA       |
| Kerry Coughlin-Wells, RN | Boston Children's Hospital                | Boston, MA       |
| Jaelyn French            | Boston Children's Hospital                | Boston, MA       |
| Kyle Hughes              | Boston Children's Hospital                | Boston, MA       |
| Martha Sisko, RN         | Children's Hospital of Philadelphia       | Philadelphia, PA |

## Study Organization

### Study Leadership Committee

|                               |                                                                |
|-------------------------------|----------------------------------------------------------------|
| Michael Agus, MD (Co-Chair)   | Boston Children's Hospital, Boston, MA                         |
| Vinay Nadkarni, MD (Co-Chair) | Children's Hospital of Philadelphia, Philadelphia, PA          |
| David Wypij, PhD (Co-Chair)   | Boston Children's Hospital, Boston, MA                         |
| Katherine Biagas, MD          | Children's Hospital of New York, New York, NY                  |
| Martha Curley, PhD            | University of Pennsylvania School of Nursing, Philadelphia, PA |
| Vincent Faustino, MD          | Yale New Haven Medical Center, New Haven, CT                   |
| Andrea Harabin, PhD           | National Heart, Lung, and Blood Institute, Bethesda, MD        |
| Elliott Hirshberg, MD         | Intermountain Medical Center, Salt Lake City, UT               |
| Peter Lockett, MD             | Children's Medical Center Dallas, Dallas, TX                   |
| Vijay Srinivasan, MD          | Children's Hospital of Philadelphia, Philadelphia, PA          |
| Garry Steil, PhD              | Boston Children's Hospital, Boston, MA                         |

### Ancillary Study Committee

|                           |                                                                |
|---------------------------|----------------------------------------------------------------|
| Peter Lockett, MD (Chair) | Children's Medical Center Dallas, Dallas, TX                   |
| Michael Agus, MD          | Boston Children's Hospital, Boston, MA                         |
| Katherine Biagas, MD      | Children's Hospital of New York, New York, NY                  |
| Martha Curley, PhD        | University of Pennsylvania School of Nursing, Philadelphia, PA |
| J. Michael Dean, MD       | Primary Children's Hospital, Salt Lake City, UT                |
| Andrea Harabin, PhD       | National Heart, Lung, and Blood Institute, Bethesda, MD        |

Jacques Lacroix, MD  
Vinay Nadkarni, MD  
David Wypij, PhD

CHU Sainte-Justine, Montreal, Canada  
Children's Hospital of Philadelphia, Philadelphia, PA  
Boston Children's Hospital, Boston, MA

### **Manuscript Oversight Committee (MOC)**

Vinay Nadkarni, MD (Co-Chair)  
Michael Agus, MD (Co-Chair)  
David Wypij, PhD (Co-Chair)  
Jamin Alexander  
Lisa Asaro, MS  
Katherine Biagas, MD  
Martha Curley, PhD  
Peter Lockett, MD

Children's Hospital of Philadelphia, Philadelphia, PA  
Boston Children's Hospital, Boston, MA  
Children's Hospital of New York, New York, NY  
University of Pennsylvania School of Nursing, Philadelphia, PA  
Children's Medical Center Dallas, Dallas, TX

### **Data and Safety Monitoring Board (DSMB)**

Marc Moss, MD (Chair)  
Robert McMahon, PhD  
Theresa O'Lonergan, PhD  
Judy Owens, MD, PhD  
Mark Palmert, MD, PhD  
Douglas White, MD, MAS  
Douglas Willson, MD

University of Colorado Denver School of Medicine, Aurora, CO  
Maryland Psychiatric Research Center, Catonsville, MD  
Catholic Health Initiatives, Englewood, CO  
Children's National Medical Center, Washington, DC  
The Hospital for Sick Children, Toronto, Canada  
University of Pittsburgh Medical Center, Pittsburgh, PA  
Children's Hospital of Richmond, Richmond, VA

### **National Heart, Lung, and Blood Institute Staff (NHLBI)**

Carol Blaisdell, MD  
Peyvand Ghofrani, MDE, CCRA  
Andrea Harabin, PhD  
Dong-Yun Kim, PhD  
Gail Weinmann, MD  
Gang Zheng, PhD

Executive Secretary to the DSMB  
Clinical Trials Specialist  
Program Officer  
Biostatistician  
Executive Secretary to the DSMB  
Biostatistician

### **Clinical Coordinating Center (CCC)**

Jamin Alexander  
Kerry Coughlin-Wells, RN  
Jaclyn French  
Kyle Hughes  
Martha Sisko, RN

Boston Children's Hospital, Boston, MA  
Children's Hospital of Philadelphia, Philadelphia, PA

### **Data Coordinating Center (DCC)**

Lisa Asaro, MS  
Donna Duva  
Natalie Hasbani, MPH

Boston Children's Hospital, Boston, MA  
Boston Children's Hospital, Boston, MA  
Boston Children's Hospital, Boston, MA

### **Other Study Performance Sites**

The following sites obtained approval from their institutional ethics review board to conduct the trial, screened patients for eligibility, but did not contribute subjects to the analyses presented in this manuscript.

James Fackler, MD

Peter Lockett, MD

Thomas Rozen, MBBS

The Johns Hopkins Hospital, Baltimore, MD

Children's Medical Center Dallas, Dallas, TX

The Royal Children's Hospital, Melbourne, Australia

### **Pediatric Acute Lung Injury & Sepsis Investigators (PALISI)**

PALISI (<http://www.palisi.org>) is a network of clinical researchers from 78 pediatric intensive care units across North America that develops multicenter trials to improve interventions and outcomes in the care of critically ill children. PALISI provided the HALF-PINT trial with meeting space and support at biannual national meetings for protocol training, trial management, and site recruitment.

## Inclusion/Exclusion Criteria

### Inclusion Criteria

1. Cardiovascular failure (on intravenous vasopressors or inotropes, i.e., dopamine or dobutamine >5 mcg/kg/min, or any dose of epinephrine, norepinephrine, phenylephrine, milrinone, or vasopressin if used to treat hypotension)  
*and/or*  
Respiratory failure (acute mechanical ventilation via endotracheal tube or tracheostomy)
2. Age  $\geq 2$  weeks and corrected gestational age  $\geq 42$  weeks
3. Age <18 years (has not yet had 18<sup>th</sup> birthday)

### Exclusion Criteria

1. No longer has cardiovascular or respiratory failure (as defined in inclusion criterion 1) or is expected to be extubated in the next 24 hours
2. Expected to remain in ICU <24 hours
3. Previously randomized in HALF-PINT
4. Enrolled in a competing clinical trial
5. Family/team have decided to limit or redirect from aggressive ICU technological support
6. Chronic ventilator dependence prior to ICU admission (non-invasive ventilation and ventilation via tracheostomy overnight or during sleep are acceptable)
7. Type 1 or 2 diabetes
8. Cardiac surgery within prior 2 months or during/planned for this hospitalization (extra-corporeal life support or non-cardiac surgery is acceptable)
9. Diffuse skin disease such that placement of a subcutaneous glucose sensor would be difficult to secure
10. Therapeutic plan to remain intubated for >28 days
11. Receiving therapeutic cooling with targeted body temperatures <34 degrees Celsius
12. Receiving a ketogenic diet
13. Ward of the state
14. Pregnancy

## Early Stopping

The National Heart, Lung, and Blood Institute appointed a Data and Safety Monitoring Board (DSMB) to monitor data and oversee patient safety in the HALF-PINT trial. Data reports were reviewed by the DSMB in July 2013, February and November 2014, May and November 2015, and May and September 2016. Group sequential monitoring based on East, version 6.4 (Cytel), was used to assess potential early stopping of the trial due to efficacy or futility using O'Brien-Fleming boundaries.<sup>1</sup> Formal interim analyses were planned to occur after 50%, 67%, 83%, and 100% of intention-to-treat patient data had accrued. Interim analyses at other time points could also be accommodated. A sample size of 1,414 provides 80% power to detect a clinically important difference of 1.25 ICU-free days in a two-sided test.

For its meeting on September 13, 2016, the DSMB reviewed intention-to-treat data on the primary outcome, ICU-free days, from 698 patients (350 assigned to TGC-1, 348 assigned to TGC-2; 49% of the total horizon of 1,414 patients). They also reviewed additional analyses performed on a per-protocol basis for 683 patients (339 assigned to TGC-1, 344 assigned to TGC-2), excluding 10 patients withdrawn prior to the intervention due to a change in eligibility status and five whose guardians withdrew full consent.

At that time, the ICU-free days hazard ratio comparing TGC-1 vs. TGC-2 was 0.96 (95% confidence interval, 0.81 to 1.14,  $P=0.65$ ) adjusting for age group and PRISM-III 12 score, where a hazard ratio  $<1.0$  implies fewer ICU-free days for the TGC-1 group. Using East software, this first interim look with 698 patients gave stopping rules of  $P<0.0028$  for efficacy and  $P>0.7017$  for futility. The observed  $P=0.65$  did not fall within either the efficacy or futility regions.

The DSMB also requested that conditional power analyses be performed for their September 13, 2016, meeting. Conditional power is the probability that final study results would reach statistical significance, given the data observed to date and specific assumptions about the patterns of the remaining data to accrue. Given non-normally distributed ICU-free days and the use of adjusted proportional hazards regression, we resorted to simulations to approximate conditional power. In particular, we sampled (with replacement) from the observations obtained to date to simulate new observations. Future TGC-2 patients were sampled from the TGC-2 patients to date. Future TGC-1 patients were sampled from the TGC-1 patients to date, with the same distribution to date or with adjusting future TGC-1 subjects to have more ICU-free days. These future simulated subjects were added to the data accrued to date. We ran

---

<sup>1</sup> O'Brien PC, Fleming TR. A multiple testing procedure for clinical trials. *Biometrics*. 1979;35(3):549-56.



2,000 simulations and calculated the proportion of times that we reached statistical significance at the two-sided  $P < 0.05$  level (see table below).

| <b>Assumed Future Improvement in ICU-Free Days in the TGC-1 Group</b> | <b>Percent of Times TGC-1 is Significantly Better than TGC-2 (exact 95% confidence interval)</b> | <b>Percent of Times TGC-2 is Significantly Better than TGC-1</b> |
|-----------------------------------------------------------------------|--------------------------------------------------------------------------------------------------|------------------------------------------------------------------|
| 0                                                                     | 0% (0% to 0.2%)                                                                                  | 3.5%                                                             |
| 0.4                                                                   | 0% (0% to 0.2%)                                                                                  | 1.5%                                                             |
| 0.8                                                                   | 0.2% (0% to 0.4%)                                                                                | 0.7%                                                             |
| 1.2                                                                   | 0.9% (0.5% to 1.4%)                                                                              | 0.3%                                                             |
| 1.25                                                                  | 0.9% (0.5% to 1.4%)                                                                              | 0.2%                                                             |
| 2.2                                                                   | 4.2% (3.4% to 5.2%)                                                                              | 0%                                                               |
| 5.2                                                                   | 65.4% (63.2% to 67.4%)                                                                           | 0%                                                               |

Thus, even under an anticipated improvement of 1.25 ICU-free days in the remaining TGC-1 patients, the conditional power, or chance of the TGC-1 group being statistically significantly better than the TGC-2 group, was approximately 1%.

At the September 13, 2016, DSMB review of unblinded outcome and safety data from the first 698 subjects, formal O'Brien-Fleming stopping boundaries for efficacy or futility, and conditional power estimates, the DSMB unanimously recommended that the study should be discontinued based on their review of the totality of the data and the low likelihood of being able to achieve a statistically significant result for the primary outcome variable if the study had progressed further. The National Heart, Lung, and Blood Institute stopped the trial on September 14, 2016. Two subjects on study at that time had their study treatment discontinued and are not included in data analyses. Subjects already through the study protocol were assessed for 28-day and 90-day hospital mortality as planned. The final sample size accrued was 713 for intention-to-treat analyses and 698 for per-protocol analyses.

## Supplemental Figures

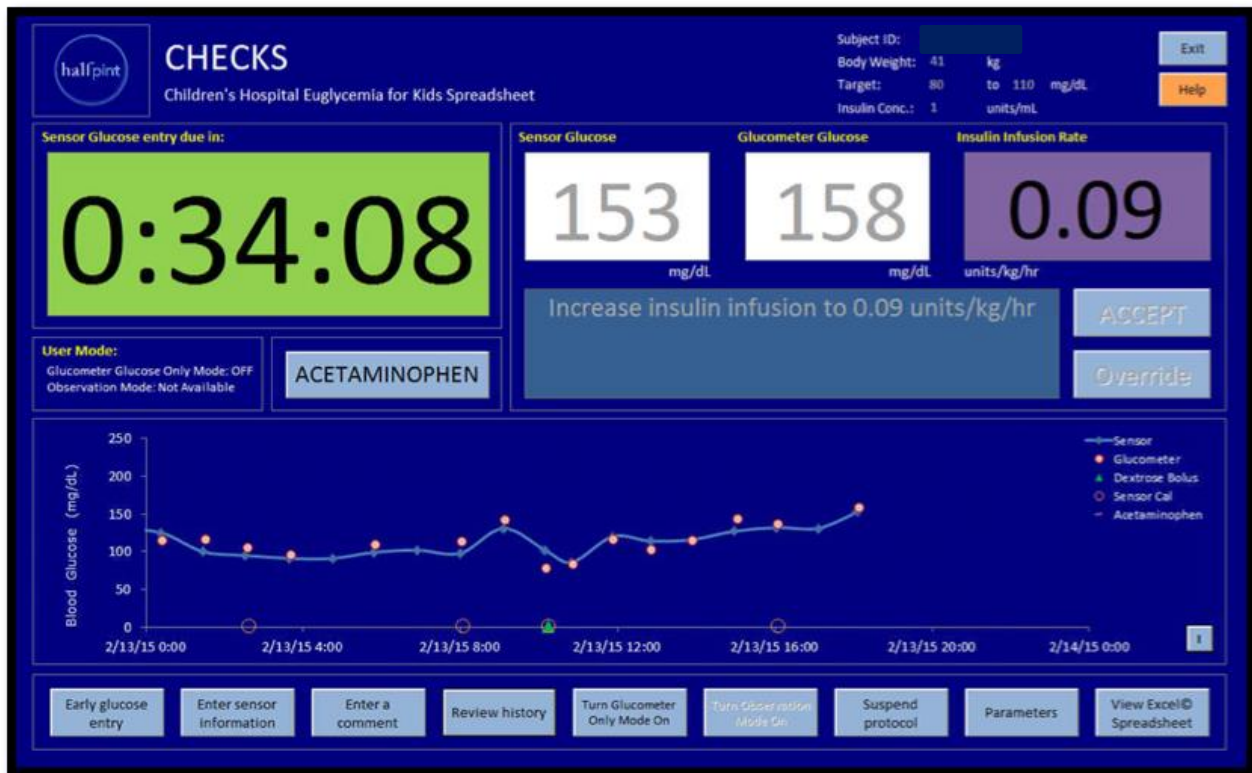

**Figure S1. Children's Hospital Euglycemia for Kids Spreadsheet (CHECKS) interface.**

Children's Hospital Euglycemia for Kids Spreadsheet (CHECKS) is a Microsoft Excel® spreadsheet with additional VBA programming designed by authors GMS, JLA, ELH, and MSDA to recommend insulin infusion rates, dextrose rescue boluses if needed, and timing of blood glucose measurements and glucose sensor calibration. All dosing recommendations are made based upon glucose meter measurements of blood glucose, with the timing of the next measurement guided by sensor glucose measurements obtained from a continuous glucose monitor that reports interstitial glucose concentrations every 5 minutes.

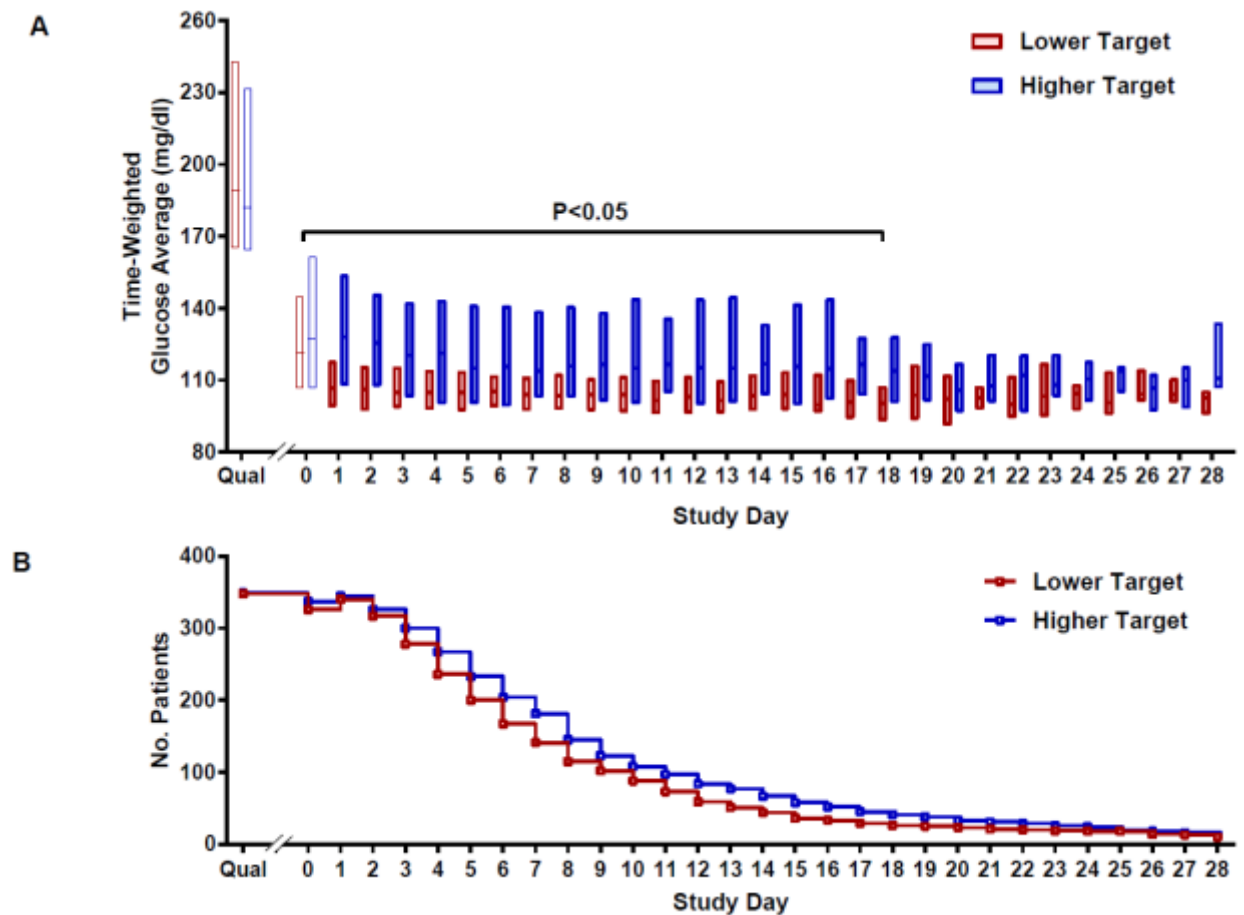

**Figure S2. Time-Weighted Glucose Averages through Day 28, According to Study Group.**

Data are for all 28 study days. Panel A shows time-weighted glucose averages obtained from linear interpolation of glucose values used to administer tight glycemic control protocol. Shaded bars indicate full study days (00:00 to 23:59); open bars indicate either partial study day (Day 0) or value used to qualify for study (Qual). Panel B shows total number of subjects receiving insulin therapy by day. P values for the comparison between groups were calculated with the use of Wilcoxon rank-sum tests (not adjusting for multiple comparisons).

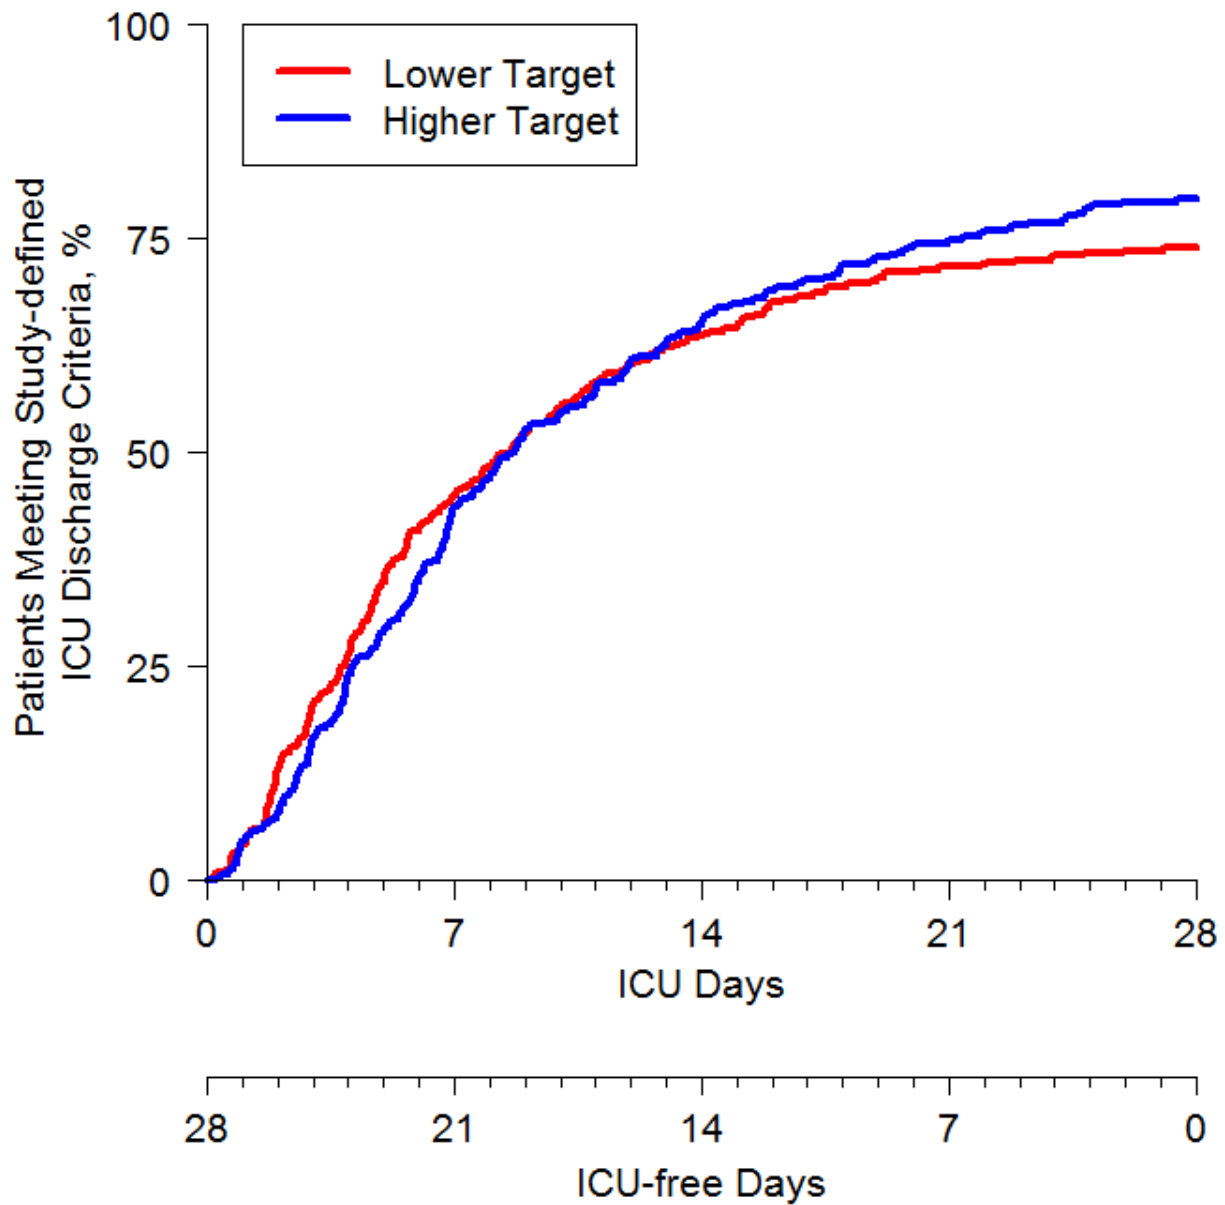

**Figure S3. Time to Study-defined ICU Discharge in Intention-To-Treat Analysis of 713 Patients, According to Study Group.**

Patients not meeting study-defined ICU discharge criteria by Day 28 (zero ICU-free days) were still receiving invasive mechanical ventilation, non-invasive ventilation that provides  $\geq 5$  cm H<sub>2</sub>O pressure, or vasoactive infusions, were transferred to another hospital, or died. The P value for the comparison between treatment groups was 0.58, calculated with the use of proportional hazards regression with adjustment for age group and PRISM III-12 score. ICU denotes intensive care unit.

## Supplemental Tables

**Table S1. Reasons Patients were Ineligible or Guardian was not Approached.**

| <b>Reason*</b>                                                                                                                                         | <b>N=19,750</b> |
|--------------------------------------------------------------------------------------------------------------------------------------------------------|-----------------|
| Patient never had BG >130 mg/dl (7.2 mmol/l) within 14 days of initial screening                                                                       | 9562 (48)       |
| Patient had one or more exclusion criteria (more than one allowed)                                                                                     | 7626 (39)       |
| No longer has study-defined cardiovascular or respiratory failure, or is expected to be extubated in the next 24 hours                                 | 4918            |
| Chronic ventilator dependence prior to ICU admission (non-invasive ventilation and ventilation via tracheostomy overnight/during sleep are acceptable) | 1033            |
| Family/team decision to limit/redirect from aggressive ICU technological support                                                                       | 645             |
| Cardiac surgery within prior 2 months or during/planned for this hospitalization                                                                       | 440             |
| Expected to remain in ICU <24 hours                                                                                                                    | 295             |
| Type 1 or 2 diabetes                                                                                                                                   | 170             |
| Ward of the state                                                                                                                                      | 116             |
| Enrolled in a competing clinical trial                                                                                                                 | 81              |
| Receiving therapeutic cooling with targeted body temperatures <34 °C                                                                                   | 67              |
| Current or planned ketogenic diet                                                                                                                      | 65              |
| Diffuse skin disease such that placement of a subcutaneous glucose sensor would be difficult to secure                                                 | 57              |
| Previously randomized in HALF-PINT                                                                                                                     | 56              |
| Therapeutic plan to remain intubated for >28 days                                                                                                      | 44              |
| Pregnancy                                                                                                                                              | 1               |
| Guardian was not approached                                                                                                                            | 2562 (13)       |
| Insufficient access for insulin and blood glucose measurements                                                                                         | 666             |
| Patient did not have two consecutive BG ≥150 mg/dl (8.3 mmol/l) within 14 days of initial screening                                                    | 603             |
| Systems or staff coverage issues                                                                                                                       | 396             |
| Attending physician did not allow approach for consent                                                                                                 | 258             |
| Guardian unavailable                                                                                                                                   | 220             |
| Study equipment not available                                                                                                                          | 106             |
| Language barrier                                                                                                                                       | 100             |
| Patient died before consent                                                                                                                            | 54              |
| Previous guardian refusal to HALF-PINT or other study                                                                                                  | 38              |
| Perceived or actual incompatibility with protocol                                                                                                      | 31              |
| Enrollment ceased                                                                                                                                      | 30              |
| Guardianship issues                                                                                                                                    | 28              |
| Other**                                                                                                                                                | 32              |

\* Data are no. (%).

\*\* Other includes patient transferred to another ICU or hospital, pregnancy status could not be verified, and guardian unable to understand consent process.

**Table S2. Reasons Patients were Consented but Not Randomized.**

| <b>Reason*</b>                                                                                                                                      | <b>N=110</b> |
|-----------------------------------------------------------------------------------------------------------------------------------------------------|--------------|
| Consent obtained when BG>130 mg/dl but BG never $\geq$ 150 mg/dl prior to ICU discharge or within 28 days, so were never eligible for randomization | 77 (70)      |
| Patient became ineligible after confirmatory BG $\geq$ 150 mg/dl                                                                                    | 17 (15)      |
| Clinician request due to situational concerns                                                                                                       | 11 (10)      |
| Withdrawal of consent                                                                                                                               | 5 (4)        |

\* Data are no. (%).
